# Replication of MERS and SARS coronaviruses in bat cells offers insights to their ancestral origins

Susanna K. P. Lau,<sup>a,b,c,d†\*</sup> Rachel Y. Y. Fan,<sup>b†</sup> Hayes K. H. Luk,<sup>b†</sup> Longchao Zhu,<sup>b</sup> Joshua Fung,<sup>b</sup> Kenneth S. M. Li,<sup>b</sup> Emily Y.M. Wong,<sup>b</sup> Syed Shakeel Ahmed,<sup>b</sup> Jasper F. W. Chan,<sup>a,b,c,d</sup> Raven K. H. Kok,<sup>a,b,c,d</sup> Kwok-Hung Chan,<sup>a,b,c,d</sup> Ulrich Wernery,<sup>f</sup> Kwok-Yung Yuen,<sup>a,b,c,d</sup> Patrick C. Y. Woo<sup>a,b,c,d\*</sup>

State Key Laboratory of Emerging Infectious Diseases,<sup>a</sup> Department of Microbiology,<sup>b</sup> Carol Yu Centre for Infection,<sup>c</sup> Collaborative Innovation Center for Diagnosis and Treatment of Infectious Diseases,<sup>d</sup> Li Ka Shing Faculty of Medicine, The University of Hong Kong, Hong Kong, China; Agriculture, Fisheries and Conservation Department,<sup>e</sup> The Government of the Hong Kong Special Administrative Region, China; Central Veterinary Research Laboratory,<sup>f</sup> Dubai, The United Arab Emirates

Running title: replication of MERS coronavirus in bat cells

<sup>†</sup>SKP Lau, RYY Fan and HKH Luk contributed equally to the manuscript.

\*Corresponding authors. Mailing address: Susanna KP Lau, State Key Laboratory of Emerging Infectious Diseases, Department of Microbiology, The University of Hong Kong, Room 423, University Pathology Building, Queen Mary Hospital, Hong Kong, China. E-mail: [skplau@hku.hk](mailto:skplau@hku.hk); Patrick CY Woo, State Key Laboratory of Emerging Infectious Diseases,

- 23 Department of Microbiology, The University of Hong Kong, Room 423, University Pathology  
24 Building, Queen Mary Hospital, Hong Kong, China. E-mail: [pcywoo@hku.hk](mailto:pcywoo@hku.hk)

25

## ABSTRACT

Previous findings of Middle East Respiratory Syndrome coronavirus (MERS-CoV)-related viruses in bats, and the ability of *Tylonycteris*-BatCoV HKU4 spike protein to utilize MERS-CoV receptor, human dipeptidyl peptidase 4 hDPP4, suggest a bat ancestral origin of MERS-CoV. We developed 12 primary bat cell lines from seven bat species, including *Tylonycteris pachypus*, *Pipistrellus abramus* and *Rhinolophus sinicus* (hosts of *Tylonycteris*-BatCoV HKU4, *Pipistrellus*-BatCoV HKU5 and SARS-related-CoV respectively), and tested their susceptibilities to MERS-CoVs, SARS-CoV and human coronavirus 229E (HCoV-229E). Five cell lines, including *P. abramus* and *R. sinicus* but not *T. pachypus* cells, were susceptible to human MERS-CoV EMC/2012. However, three tested camel MERS-CoV strains showed different infectivities, with only two strains capable of infecting three and one cell lines respectively. SARS-CoV can only replicate in *R. sinicus* cells, while HCoV-229E cannot replicate in any bat cells. Bat dipeptidyl peptidase 4 (DPP4) sequences were closely related to those of human and non-human primates but distinct from dromedary DPP4 sequence. Critical residues for binding to MERS-CoV spike protein were mostly conserved in bat DPP4. DPP4 was expressed in the five bat cells susceptible to MERS-CoV, with significantly higher mRNA expression levels than those in non-susceptible cells ( $P=0.0174$ ), supporting that DPP4 expression is critical for MERS-CoV infection in bats. However, overexpression of *T. pachypus* DPP4 failed to confer MERS-CoV susceptibility in *T. pachypus* cells, suggesting other cellular factors in determining viral replication. The broad cellular tropism of MERS-CoV should prompt further exploration of host diversity of related viruses to identify its ancestral origin.

## IMPORTANCE

Existing evidence suggests that MERS-CoV may be originated from bats. In particular, *Tylonycteris*-BatCoV HKU4 spike protein was shown to utilize MERS-CoV receptor, human dipeptidyl peptidase 4 (DPP4). To better understand the potential infectivities of MERS-CoV in bats, we developed 12 primary bat cell lines from seven bat species, including *Tylonycteris pachypus* and *Rhinolophus sinicus* (host of *Tylonycteris*-BatCoV HKU4 and SARS-related-CoV respectively). MERS-CoV demonstrated much broader cellular tropism than SARS-CoV and HCoV-229E, being able to infect five cell lines, including *R. sinicus* but not *T. pachypus* cells. The close phylogenetic relationship between bat and human DPP4 genes supported the ability of MERS-CoV to infect bat cells, while DPP4 expression appeared critical for MERS-CoV replication. However, overexpression of *T. pachypus* DPP4 failed to confer MERS-CoV susceptibility in *T. pachypus* cells. The broad cellular tropism of MERS-CoV may reflect the host diversity of MERS-CoV-related viruses and offers insights into its ancestral origin.

## INTRODUCTION

Coronaviruses (CoVs) are important pathogens in animals and humans, responsible for a variety of respiratory, enteric, hepatic and neurological diseases. They are now classified into four genera, *Alphacoronavirus*, *Betacoronavirus*, *Gammacoronavirus* and *Deltacoronavirus*, with *Betacoronavirus* further divided into lineages A to D (1-6). Humans are infected by six CoVs, including *human CoV 229E* (HCoV-229E) and *human CoV NL63* (HCoV-NL63) belonging to *Alphacoronavirus*; *human CoV OC43* (HCoV-OC43) and *human CoV HKU1* (HCoV HKU1) belonging to *Betacoronavirus* lineage A; *Severe Acute Respiratory Syndrome-related CoV* (SARSr-CoV) belonging to *Betacoronavirus* lineage B; and *Middle East Respiratory Syndrome CoV* (MERS-CoV) belonging to *Betacoronavirus* lineage C (7-16). The emergence potential of CoVs is believed to be related to their tendency for mutation and recombination, allowing the generation of new viruses being able to adapt to new hosts (5, 17-24).

Bats are an important reservoir of alphacoronaviruses and betacoronaviruses which may jump to other animals or humans to cause new epidemics (4, 25). For example, SARS-CoV is likely a recombinant virus originated from horseshoe bats as the primary reservoir and palm civet as the intermediate host (22, 26-33). Since the SARS epidemic, numerous other novel CoVs from humans or animals have been discovered (4, 34-40), allowing a better understanding of the evolutionary origin of emerging CoVs.

Although dromedary camels are now known to be the immediate animal source of the recent MERS epidemic, the evolutionary origin of MERS-CoV remains obscure (41-43). When the virus was first discovered, it was found to be closely related to *Tylonycteris* bat CoV HKU4 (Ty-BatCoV HKU4) and *Pipistrellus* bat CoV HKU5 (Pi-BatCoV HKU5) previously

discovered in lesser bamboo bat (*Tylonycteris pachypus*) and Japanese pipistrelle (*Pipistrellus abramus*) respectively in Hong Kong (5, 14, 15, 44, 45). Five other lineage C betacoronaviruses closely related to MERS-CoV were subsequently detected in bats, including BtVs-BetaCoV/SC2013, Hp-BatCoV HKU25 from China bats and Coronavirus Neoromicia/PML-PHE1/RSA/2011 (NeoCoV), BtCoVNeo5038/KZN/RSA/2015 and BatCoV PREDICT/PDF-2180 from African bats (46-50). Besides bats, a lineage C betacoronavirus, Erinaceus CoV VMC/DEU, subsequently defined as a novel species, Hedgehog coronavirus 1, has also been discovered in European hedgehogs, a group of animals being phylogenetically closely related to bats (51). While none of these animal viruses represents the immediate ancestor of MERS-CoV, the spike protein of Ty-BatCoV HKU4 was most closely related to that of MERS-CoV, and was shown to utilize the MERS-CoV receptor, human dipeptidyl peptidase 4 (hDPP4) or CD26, for cell entry (52, 53). Previous studies have also shown that MERS-CoV was able to infect bat cell lines and Jamaican fruit bats (54, 55). These findings suggest that bats may be the primary host of the ancestor of MERS-CoV.

Although MERS-CoV has been shown to replicate in various animal cell lines including bat cells (54-59), the broad tissue tropism was mainly demonstrated using type strain EMC/2012, and no comparison was made between different MERS-CoV strains. Moreover, cells from the bat hosts of MERS-CoV-related viruses, such as *T. pachypus* and *P. abramus* which harbor Ty-BatCoV HKU4 and Pi-BatCoV HKU5 respectively, were not included in previous studies, which may be due to the geographical limitation of these bat species. To better understand the replicative ability of MERS-CoV in bat cells, which may provide clues on the origin of MERS-CoV, we developed diverse primary bat cell lines from different bat species, including *Rhinolophus sinicus* (the host of SARSr-BatCoV) and *T. pachypus* (the host of Ty-

108 BatCoV HKU4), and tested their susceptibilities to infection by different strains of MERS-CoV,  
 109 SARS-CoV and HCoV-229E. The DPP4 mRNA sequences of six bat species and their  
 110 expression in bat cells were determined to correlate with viral replication results. Our findings  
 111 showed differential cell tropism between different strains of MERS-CoV, SARS-CoV and  
 112 HCoV-229E, which offers insights to the origin of MERS-CoV.

113

## RESULTS

**Five of 12 tested bat cell lines are susceptible to MERS-CoV EMC/2012 infection.** Since lineage C betacoronaviruses closely related to MERS-CoV were detected in bats, we developed 12 diverse primary bat cell lines from seven different bat species, including *Hipposideros pomona*, *Miniopterus pusillus*, *Myotis ricketti*, *Pipistrellus abramus* (the host of Pi-BatCoV HKU5), *Rhinolophus sinicus* (the host of SARSr-BatCoV and Rs-BatCoV HKU2), *Tylonycteris pachypus* (the host of Ty-BatCoV HKU4), *Rousettus leschenaultii* (the host of many viruses including Ro-BatCoV HKU9), which were subject to infection with MERS-CoV at multiplicity of infection (MOI) of 1. Viral titers were determined by RT-qPCR on day 5 p.i.. Five of the 12 cell lines (*M. ricketti* lung, *P. abramus* kidney, *R. sinicus* kidney and lung, and *R. leschenaultii* kidney cells) propagated MERS-CoV with at least one log<sub>10</sub> increase in viral load. The highest increase in viral load was observed in *R. sinicus* kidney and lung cells, which was comparable to that observed in Vero cells (Fig. 1). Cytopathic effects (CPEs) were observed in infected *M. ricketti* lung and *R. sinicus* lung cells (Fig. 2). The infectivities of the viruses from culture supernatants were confirmed by passage in Vero cells with CPE. *H. pomona* kidney, *M. pusillus* kidney, *M. ricketti* kidney, *P. abramus* lung, *R. leschenaultii* lung and *T. pachypus* kidney and lung cells did not support MERS-CoV infection.

**Different MERS-CoV strains displayed different infectivities on bat cells.** MERS-CoVs are currently classified into three major clades, clade A, B and C, which were further divided into subclades A1-A2, B1-B6, C1 and non-C1 (60-63). To test if different MERS-CoV strains may show similar infectivities on bat cells, the five bat cells (*M. ricketti* lung, *P. abramus* kidney, *R. sinicus* kidney and lung, and *R. leschenaultii* kidney cells), which were susceptible to MERS-CoV EMC/2012 (belonging to clade A1), were subject to infection by



three other MERS-CoV strains isolated from camels in Dubai, D998/15 (belonging to clade A2), and D1189.1/15 and D1271.1/15 (both belonging to clade B3)(62). Among the five challenged bat cells, *M. ricketti* lung supported infection by both D1189.1/15 and D1271.1/15; while *R. sinicus* lung and *R. leschenaulti* kidney supported infection by D1189.1/15, with at least one  $\log_{10}$  increase in viral load. None of the cells supported infection by D998/15 (Fig. 1).

**SARS-CoV can replicate in *R. sinicus* cells.** Since Chinese horseshoe bats are the major reservoir of SARS-related-CoVs, we also tested the 12 bat cell lines, including *R. sinicus* cells, for susceptibility to a clinical strain of SARS-CoV. SARS-CoV strain HKU-39849 can replicate in *R. sinicus* kidney but not lung cells, with at least one  $\log_{10}$  increase in viral load (Fig. 3A). The other bat cells did not support SARS-CoV infection.

**HCoV-229E cannot replicate in bat cells.** The 12 bat cells were also tested for susceptible to HCoV-229E infection. HCoV-229E strain ATCC VR-740, previously isolated from a man with upper respiratory illness, cannot replicate in any of the tested bat cells (Fig. 3B).

**mRNA transcript sequence analysis and expression of DPP4 in bat cells.** Partial DPP4 mRNA transcript sequences (corresponding to nt 688-1040 of hDPP4 which includes residue 229-346 where the critical residues for MERS-CoV spike protein binding are present) were determined for six of the seven bat species from which the 12 tested bat cells were developed. The sequence of *M. pusillus* was not determined, as RT-PCR for the DPP4 mRNA from bat cells was negative. Phylogenetic analysis showed that the bat DPP4 mRNA sequences formed a distinct cluster being closely related to sequences from human and non-human primates; while the dromedary camel DPP4 sequence was most closely related to that of wild boar (Fig. 4A). Previous studies have identified 14 critical residues in hDPP4 for binding of

MERS-CoV spike protein (64, 65). Upon multiple sequence alignment of the corresponding regions that contain these critical residues, most of the residues are conserved in the six bat DPP4 sequences in this study (Fig. 3B). Notably, *T. pachypus* DPP4 (Tp-DPP4) contains an I→K substitution at position 295 compared to hDPP4. On the other hand, residue R336 of hDPP4 was only conserved in *T. pachypus* and *H. pomona*, both not susceptible to MERS-CoV infection.

RT-qPCR of bat DPP4 mRNA in the corresponding bat cells was performed to determine the mRNA expression levels. Results showed that DPP4 mRNA was expressed in all the five bat cells that were susceptible to MERS-CoV infection, while it was also expressed in *H. pomona* kidney and *R. leschenaulti* lung cells which were not susceptible to MERS-CoV infection. The mRNA expression level in *P. abramus* kidney (susceptible to MERS-CoV) was significantly higher than that in its lung (no-susceptible) cells ( $P=0.0185$  by student's t test). Similarly, the mRNA expression level in *R. leschenaulti* kidney (susceptible to MERS-CoV) was significantly higher than that in its lung (no-susceptible) cells ( $P=0.0009$  by student's t test). Compared to bat cells that are non-susceptible, bat cells that are susceptible to MERS-CoV showed a significantly higher mRNA expression level ( $P=0.0174$  by student's t test) (Fig. 5).

**Over-expression of Tp-DPP4 does not confer MERS-CoV EMC/2012 susceptibility to *T. pachypus* cells.** Since DPP4 was not expressed in *T. pachypus* cells while this bat species hosts Ty-BatCoV HKU4, a close relative of MERS-CoV which can utilize hDPP4 for cell entry (52, 53), we overexpressed Tp-DPP4 in *T. pachypus* lung and kidney cells for infection by MERS-CoV. While a slight increase (less than one  $\log_{10}$ ) in viral replication was noted in both mock and Tp-DPP4-overexpressed cells on day 5 p.i., no significant difference was noted

182 between mock and Tp-DPP4-overexpressed cells (Fig. 6) , suggesting that over-expression of  
183 Tp-DPP4 does not confer MERS-CoV susceptibility to *T. pachypus* cells.  
184

## DISCUSSION

The present study provides further support to the bat origin of MERS-CoV. Previous studies have shown that MERS-CoV can infect cell lines from different animals including cells from various bat species (54-58). However, bat cells from host species of MERS-CoV-related viruses, such as *T. pachypus* and *P. abramus* which harbor Ty-BatCoV HKU4 and Pi-BatCoV HKU5 respectively, were not included in these studies. In this study, MERS-CoV EMC/2012 was able to replicate in cells from four different bat genera/species belonging to three different bat families including *Pteropodidae*, *Rhinolophidae* and *Vespertilionidae*. None of these bat cells were previously reported to support MERS-CoV replication. While lineage C betacoronaviruses have not been detected in bats outside the *Vespertilionidae* family, such diverse cellular tropism should prompt further studies to explore the host diversity of this group of CoVs and hence the possible evolutionary origin of MERS-CoV. In particular, the ability of MERS-CoV to replicate in cells from *P. abramus*, the host of Pi-BatCoV HKU5, may suggest that the ancestor of MERS-CoV could have originated from *Pipistrellus*-related bats. Interestingly, MERS-CoV showed the highest replicative ability in cells from *R. sinicus*. This suggests that MERS-CoV may potentially infect this bat species which is also the natural reservoir of SARS-CoVs and animal origin of SARS-CoV (27, 29). Nevertheless, three other MERS-CoV strains belonging to either clade A2 or B3 showed differential replicative abilities in the five bat cell lines that were susceptible to EMC/2012 strain (clade A1), with strain D998/15 (clade A2) unable to replicate in all five tested cell lines. This may suggest that different MERS-CoV strains could possess different cellular tropism and host range.

The broader cellular tropism of MERS-CoV than SARS-CoV and HCoV-229E in bat cells may reflect the host diversity of lineage C betacoronaviruses in bats. Bats are now known

208 to be the recent origin of at least two human CoVs including SARS-CoV and HCoV-229E.  
 209 SARS-CoV is likely a recombinant virus arising from horseshoe bats before it jumped to civet  
 210 as the intermediate host and then human (22, 31, 32, 66). SARSr-CoVs in bats were shown to  
 211 utilize the SARS-CoV receptor, human angiotensin-converting enzyme 2 (hACE2), for cell  
 212 entry (67). Similar to SARS-CoV, HCoV-229E is likely to have originated from bats. CoVs  
 213 closely related to HCoV-229E have been detected in bats of the genus *Hipposideros* in Africa  
 214 (68). More recently, CoVs even closer to HCoV-229E were identified in dromedary camels in  
 215 the Middle East, which were able to utilize the receptor of HCoV-229E, human aminopeptidase  
 216 N (hAPN) for cell entry (69). This suggests that dromedary camels may have served as  
 217 intermediate hosts for bat-to-human transmission of HCoV-229E, which may be analogous to  
 218 the evolution of MERS-CoV. Recently, a CoV, closely related to HCoV-NL63 in most genome  
 219 regions except the spike protein, was detected from a bat of the genus *Triaenops* in Kenya (70).  
 220 However, further studies are required to identify even closer relatives of HCoV-NL63 to  
 221 ascertain its possible bat origin. In contrast to SARSr-CoVs and HCoV-229E which were  
 222 mainly found in horseshoe and roundleaf bats respectively, a more diverse host range was  
 223 observed in lineage C betacoronaviruses. Yet, the different bat species harboring lineage C  
 224 betacoronaviruses all belonged to the family *Vespertilionidae*. Specifically, Ty-BatCoV HKU4,  
 225 Pi-BatCoV HKU5, Hp-BatCoV HKU25 and BtVs-BetaCoV/SC2013 were detected in bats  
 226 belonging to the genera, *Tylonycteris*, *Pipistrellus*, *Hypsugo* and *Vesperugo*, respectively in  
 227 China, whereas NeoCoV and BatCoV PREDICT/PDF-2180 were detected in bats belonging to  
 228 *Neoromicia* and *Pipistrellus* in Africa (47, 48). In this study, SARS-CoV could only replicate in  
 229 *R. sinicus* kidney cells but not other bat cells, which reflects its evolutionary origin from  
 230 horseshoe bats. On the other hand, HCoV-229E was unable to replicate in any tested bat cells

including cells from *Hipposideros*. This may suggest a relatively narrow host range of SARS-CoV and HCoV-229E in bats compared to lineage C betacoronaviruses including MERS-CoV.

The close phylogenetic relationship between bat and primate DPP4 sequences may reflect the replicative ability of MERS-CoV in bat cells. Moreover, cells that supported MERS-CoV replication showed significantly higher DPP4 mRNA expression than those that were non-susceptible to MERS-CoV, suggesting that cellular DPP4 expression is critical for viral infection. Since Ty-BatCoV HKU4 from *T. pachypus* was previously shown to be able to utilize hDPP4 for cell entry (52, 53), we expected MERS-CoV to be able to utilize Tp-DPP4 for receptor binding and infect *T. pachypus* cells. While the inability of MERS-CoV to replicate in *T. pachypus* cells may be partly explained by the lack of DPP4 expression, over-expression of Tp-DPP4 was unable to confer viral susceptibility. Further studies are required to study the receptor-binding interphase between MERS-CoV and Tp-DPP4 and whether other cellular factors may play a role in determining viral replicative abilities in *T. pachypus* cells, which may offer further insights into the evolutionary origin and mechanisms of interspecies transmission of MERS-CoV. Interestingly, one of the critical residues for binding to MERS-CoV spike protein, R336, was only conserved in *T. pachypus* and *H. pomona* DPP4 (cells from these two species did not support MERS-CoV replication), but not in the other four sequenced bat DPP4 (cells from these four species supported MERS-CoV replication). This suggests that this residue may be less important for receptor binding. Binding and mutagenesis studies may help better understand the role of receptor-binding-interphase during viral evolution and interspecies jumping.

## MATERIALS AND METHODS

**Ethics statement.** The collection of bat samples for developing bat cell lines was approved by the Committee on the Use of Live Animals for Teaching and Research, the University of Hong Kong, Hong Kong, China.

**Cell lines.** The bat cells, Vero (African green monkey kidney) cells and HFL (human embryonic lung fibroblast) cells used in this study are described in Table 1. For development of primary bat cell lines, bats were captured in Hong Kong and euthanized before dissection for recovery of cells from organs aseptically. Briefly, kidney and lung tissue were rinsed with cold PBS and cut into small pieces. Cold 0.25% trypsin-EDTA was added to the tissues and incubated at 4°C overnight. Tissues were then incubated at 37°C on shaking platform for 30 min. Supernatants were filtered through cell strainers to remove large pieces of tissues (71) Bat cells were harvested by spinning down the supernatant at 1200 rpm for 8 min and were grown in DMEM/F12 supplemented with 15% FBS. Vero and HFL cells were grown in MEM supplemented with 10% FBS. All cells were incubated at 37°C with 5% CO<sub>2</sub>.

**Virus isolates.** MERS-CoV strain EMC/2012 was provided by Fouchier and Zaki et al (14). MERS-CoV strains D998/15, D1189.1/15 and D1271.1/15 were isolated from dromedary camels in Dubai(62). SARS-CoV strain HKU-39849 was isolated from the brother-in-law of the index patient in Hong Kong during the SARS epidemic (10). The HCoV-229E strain ATCC VR-740 was used. MERS-CoV isolates and SARS-CoV were propagated in Vero cells at MOI of 0.01 in MEM supplemented with 1% FBS. HCoV-229E was propagated in HFL.

**Infection of bat cell lines.** Viral titers were determined as median tissue culture infective dose (TCID<sub>50</sub>) per ml in confluent cells in 96-well microtiter plates. Cells were seeded onto 24-well tissue culture plates, at 2×10<sup>5</sup> cells per well with the respective medium and

incubated at 37°C and 5% CO<sub>2</sub> for 24 h prior to experiment. Cells were washed once with PBS and inoculated with 1 MOI of MERS-CoV or SARS-CoV, or 0.01 MOI of 229E for 1 h. After 1 h of viral adsorption, the supernatant was removed and cells were washed twice with PBS. The cells were maintained in MEM supplemented with 1% FBS for Vero and HFL cells and DMEM/F12 supplemented with 1% FBS for bat cells, before further incubation for 5 days.

**Viral replication studies.** To study viral replication efficiency, progeny viruses from cell culture supernatants collected at 5 days post-infection (p.i.) were subject to reverse transcription-quantitative PCR (RT-qPCR) according to our previous protocols (72). Briefly, total RNA extracted from cell culture supernatants with QIAasympyphony DSP Virus/Pathogen Mini Kit (Qiagen, Hilden, Germany) was reverse transcribed and amplified with MERS-CoV primers (forward primer 5' -CAAAACCTTCCCTAAGAAGGAAAAG -3'; reverse primer 5' -GCTCCTTTGGAGGTTTCAGACAT -3'), SARS-CoV primers (forward 5' -ACCAGAATGGAGGACGCAATG-3'; reverse 5' -GCTGTGAACCAAGACGCAGTATTAT-3') and HCoV-229E primers (forward 5' -CAGTCAAATGGGCTGATGCA-3'; reverse 5' -AAAGGGCTATAAAGAGAATAAGGTATTCT-3') using real-time one-step quantitative RT-PCR assay as described previously with modifications (56, 72). Probes for MERS-CoV [5' - (FAM)ACAAAAGGCACCAAAAGAAGAATCAACAGACC(BHQ1)-3'], SARS-CoV [5' - (FAM)ACCCCAAGGTTTACCC(NFQ)-3'] and HCoV-229E [5' - (FAM)CCCTGACGACCACGTTGTGGTTCA(BHQ1)-3'] were used (Table 2). Reactions were first incubated at 50°C for 30 min, followed by 95°C for 2 min, and were then thermal cycled for 50 cycles (95°C for 15 s, 55°C for 30 s). A series of 10 log<sub>10</sub> dilutions equivalent to 1 × 10<sup>1</sup> to 1 × 10<sup>10</sup> copies per reaction mixture were prepared to generate calibration curves and were run in parallel with the test samples. All experiments were performed in triplicate.



# **Amplification and sequencing of partial bat DPP4 mRNA transcripts.**

Total RNA was extracted from bat cell lysates using RNeasy Mini Spin Column (QIAGEN). cDNA was PCR amplified with primers, 5'- GTCACCAGAGGGTCATAAA-3' and 5'- CCACTTCCTCTGCCATCAAA-3'. The PCR mixture (25 µl) contained cDNA, PCR buffer, 200 µM (each) dNTPs, and 1.0 U Iproof Polymerase (Bio-Rad, Hercules, USA). The mixtures were amplified for 40 cycles of 98°C for 10 sec, 55°C for 30 sec and 72°C for 72 sec and a final extension at 72°C for 10 min in an automated thermal cycler (Applied Biosystems, Foster City, USA). RT-PCR products were gel purified using QIAquick gel extraction kit (Qiagen), and sequenced with an ABI Prism 3700 DNA Analyzer (Applied Biosystems). The sequences obtained were compared with sequences of DPP4 genes in GenBank database. Phylogenetic tree construction was performed based on an amino acid alignment of partial DPP4 sequences (corresponding to residue 229-346 of hDPP4) using Neighbor-Joining method with JTT model by MEGA 6.0, with bootstrap values calculated from 1000 trees.

# **DPP4 expression analysis.**

To study DPP4 expression profiles in different bat cell lines, cell lysates were collected for total RNA extraction using RNeasy Mini Spin Column (QIAGEN). RNA was eluted in 50 µl of RNase-free water and was used as template for one step RT-qPCR with SuperScript III platinum One-step qRT-PCR system (Invitrogen, Carlsbad, USA). RT-qPCR assays were performed using conserved primers designed by multiple alignment of available bat DPP4 gene sequences (Table 2), using *β-actin* for normalization. cDNA was amplified in a LightCycler 480 (Roche, Basel, Switzerland) with 25 µl reaction mixtures containing 2× reaction mix, 5 µl RNA, 25 µM ROX reference dye, 50 µM primers and 10 µM probe at 50°C for 30 min, then 95°C for 2 min followed by 50 cycles of denaturation, annealing and extension. Experiments were performed in triplicates, and results were expressed as the

mean expression level of DPP4/ $\beta$ -actin. The relative expression between different bat cells was then calculated by  $\Delta\Delta$ Ct method.

**tpDPP4 overexpression in *T. pachypus* cells.** *T. pachypus* DPP4 (tpDPP4) sequence was cloned into pLenti7.3/V5-TOPO vector (Invitrogen). The construct was transfected into 293FT cells together with ViraPower Packaging Mix (Invitrogen) using Lipofectamine 2000 (Life Technologies, Carlsbad, USA). Lentivirus was harvested from the supernatant and concentrated using PEG-it (System Biosciences, Palo Alto, USA). *T. pachypus* cells resistant to MERS-CoV were transduced using the concentrated lentivirus for tpDPP4 overexpression and were subsequently subjected to inoculation with 1 MOI of MERS-CoV.

**Nucleotide sequence accession numbers.** The nucleotide sequences of bat DPP4 obtained from this study have been deposited in the GenBank sequence database under accession numbers MH345671-MH345676.

## ACKNOWLEDGEMENTS

We thank C. T. Shek, Agriculture, Fisheries and Conservation Department, the Government of the HKSAR, for capture of bats for bat cell development and expert opinion. This work is partly supported by Theme-Based Research Scheme (T11-707/15-R) and Research Grant Council Grant, University Grant Council; Health and Medical Research Fund of the Food and Health Bureau of HKSAR; University Development Fund and Special Research Achievement Award, The University of Hong Kong; Consultancy Service for Enhancing Laboratory Surveillance of Emerging Infectious Disease for the HKSAR Department of Health; The Collaborative Innovation Center for Diagnosis and Treatment of Infectious Diseases, the Ministry of Education of China; National Science and Technology Major Project of China (grant number 2012ZX10004213). Views expressed in this paper are those of the authors only, and may not represent the opinion of the AFCD or the Government of the HKSAR.

# REFERENCE

1. **Brian DA, Baric RS.** 2005. Coronavirus Genome Structure and Replication  
doi:10.1007/3-540-26765-4\_1, p 1-30. Springer-Verlag.
2. **Lai MM, Cavanagh D.** 1997. The molecular biology of coronaviruses. *Adv Virus Res*  
**48**:1-100.
3. **de Groot RJ, Baker SC, Baric R, Enjuanes L, Gorbalenya A, Holmes KV, Perlman S, Poon L, Rottier PJ, Talbot PJ, Woo PC, Ziebuhr J.** 2011. Coronaviridae. In: *Virus Taxonomy, Classification and Nomenclature of Viruses. Ninth Report of the International Committee on Taxonomy of Viruses, International Union of Microbiological Societies, Virology Division*:806-828.
4. **Woo PC, Lau SK, Lam CS, Lau CC, Tsang AK, Lau JH, Bai R, Teng JL, Tsang CC, Wang M, Zheng BJ, Chan KH, Yuen KY.** 2012. Discovery of seven novel Mammalian and avian coronaviruses in the genus deltacoronavirus supports bat coronaviruses as the gene source of alphacoronavirus and betacoronavirus and avian coronaviruses as the gene source of gammacoronavirus and deltacoronavirus. *J Virol* **86**:3995-4008.
5. **Woo PC, Wang M, Lau SK, Xu H, Poon RW, Guo R, Wong BH, Gao K, Tsoi HW, Huang Y, Li KS, Lam CS, Chan KH, Zheng BJ, Yuen KY.** 2007. Comparative analysis of twelve genomes of three novel group 2c and group 2d coronaviruses reveals unique group and subgroup features. *J Virol* **81**:1574-1585.
6. **Gorbalenya AE, Snijder EJ, Spaan WJM.** 2004. Severe Acute Respiratory Syndrome Coronavirus Phylogeny: toward Consensus. *J Virol* **78**:7863-7866.

7. **Drosten C, Günther S, Preiser W, van der Werf S, Brodt H-R, Becker S, Rabenau H, Panning M, Kolesnikova L, Fouchier RAM, Berger A, Burguière A-M, Cinatl J, Eickmann M, Escriou N, Grywna K, Kramme S, Manuguerra J-C, Müller S, Rickerts V, Stürmer M, Vieth S, Klenk H-D, Osterhaus ADME, Schmitz H, Doerr HW.** 2003. Identification of a Novel Coronavirus in Patients with Severe Acute Respiratory Syndrome. *N Engl J Med* **348**:1967-1976.
8. **Fouchier RAM, Hartwig NG, Bestebroer TM, Niemeyer B, de Jong JC, Simon JH, Osterhaus ADME.** 2004. A previously undescribed coronavirus associated with respiratory disease in humans. *Proc Natl Acad Sci U S A* **101**:6212-6216.
9. **Ksiazek TG, Erdman D, Goldsmith CS, Zaki SR, Peret T, Emery S, Tong S, Urbani C, Comer JA, Lim W, Rollin PE, Dowell SF, Ling A-E, Humphrey CD, Shieh W-J, Guarner J, Paddock CD, Rota P, Fields B, DeRisi J, Yang J-Y, Cox N, Hughes JM, LeDuc JW, Bellini WJ, Anderson LJ.** 2003. A Novel Coronavirus Associated with Severe Acute Respiratory Syndrome. *N Engl J Med* **348**:1953-1966.
10. **Peiris JSM, Lai ST, Poon LLM, Guan Y, Yam LYC, Lim W, Nicholls J, Yee WKS, Yan WW, Cheung MT, Cheng VCC, Chan KH, Tsang DNC, Yung RWH, Ng TK, Yuen KY.** 2003. Coronavirus as a possible cause of severe acute respiratory syndrome. *Lancet* **361**:1319-1325.
11. **van der Hoek L, Pyrc K, Jebbink MF, Vermeulen-Oost W, Berkhout RJM, Wolthers KC, Wertheim-van Dillen PME, Kaandorp J, Spaargaren J, Berkhout B.** 2004. Identification of a new human coronavirus. *Nature Med* **10**:368-373.

12. **Woo PC, Lau SK, Chu CM, Chan KH, Tsoi HW, Huang Y, Wong BH, Poon RW, Cai JJ, Luk WK, Poon LL, Wong SS, Guan Y, Peiris JS, Yuen KY.** 2005. Characterization and complete genome sequence of a novel coronavirus, coronavirus HKU1, from patients with pneumonia. *J Virol* **79**:884-895.
13. **Woo PCY, Lau SKP, Tsoi Hw, Huang Y, Poon RWS, Chu Cm, Lee RA, Luk Wk, Wong GKM, Wong BHL, Cheng VCC, Tang BSF, Wu AKL, Yung RWH, Chen H, Guan Y, Chan Kh, Yuen Ky.** 2005. Clinical and Molecular Epidemiological Features of Coronavirus HKU1 – Associated Community - Acquired Pneumonia. *J Infect Dis* **192**:1898-1907.
14. **Zaki AM, van Boheemen S, Bestebroer TM, Osterhaus AD, Fouchier RA.** 2012. Isolation of a novel coronavirus from a man with pneumonia in Saudi Arabia. *N Engl J Med* **367**:1814-1820.
15. **van Boheemen S, de Graaf M, Lauber C, Bestebroer TM, Raj VS, Zaki AM, Osterhaus AD, Haagmans BL, Gorbalenya AE, Snijder EJ, Fouchier RA.** 2012. Genomic characterization of a newly discovered coronavirus associated with acute respiratory distress syndrome in humans. *MBio* **3**.
16. **de Groot RJ, Baker SC, Baric RS, Brown CS, Drosten C, Enjuanes L, Fouchier RA, Galiano M, Gorbalenya AE, Memish ZA, Perlman S, Poon LL, Snijder EJ, Stephens GM, Woo PC, Zaki AM, Zambon M, Ziebuhr J.** 2013. Middle East respiratory syndrome coronavirus (MERS-CoV): announcement of the Coronavirus Study Group. *J Virol* **87**:7790-7792.

17. **Herrewegh AA, Smeenk I, Horzinek MC, Rottier PJ, de Groot RJ.** 1998. Feline coronavirus type II strains 79-1683 and 79-1146 originate from a double recombination between feline coronavirus type I and canine coronavirus. *J Virol* **72**:4508-4514.
18. **Woo PCY, Lau SKP, Yip CCY, Huang Y, Tsoi HW, Chan KH, Yuen KY.** 2006. Comparative Analysis of 22 Coronavirus HKU1 Genomes Reveals a Novel Genotype and Evidence of Natural Recombination in Coronavirus HKU1. *J Virol* **80**:7136-7145.
19. **Keck JG, Matsushima GK, Makino S, Fleming JO, Vannier DM, Stohlman SA, Lai MM.** 1988. In vivo RNA-RNA recombination of coronavirus in mouse brain. *J Virol* **62**:1810-1813.
20. **Kottier SA, Cavanagh D, Britton P.** 1995. Experimental Evidence of Recombination in Coronavirus Infectious Bronchitis Virus. *Virology* **213**:569-580.
21. **Lau SKP, Woo PCY, Yip CCY, Fan RYY, Huang Y, Wang M, Guo R, Lam CSF, Tsang AKL, Lai KKY, Chan KH, Che XY, Zheng BJ, Yuen KY.** 2012. Isolation and Characterization of a Novel Betacoronavirus Subgroup A Coronavirus, Rabbit Coronavirus HKU14, from Domestic Rabbits. *J Virol* **86**:5481-5496.
22. **Lau SKP, Li KSM, Huang Y, Shek CT, Tse H, Wang M, Choi GKY, Xu H, Lam CSF, Guo R, Chan KH, Zheng BJ, Woo PCY, Yuen KY.** 2010. Ecoepidemiology and Complete Genome Comparison of Different Strains of Severe Acute Respiratory Syndrome-Related Rhinolophus Bat Coronavirus in China Reveal Bats as a Reservoir for Acute, Self-Limiting Infection That Allows Recombination Events. *J Virol* **84**:2808-2819.
23. **Lau SKP, Lee P, Tsang AKL, Yip CCY, Tse H, Lee RA, So LY, Lau YL, Chan KH, Woo PCY, Yuen KY.** 2011. Molecular Epidemiology of Human Coronavirus OC43

- Reveals Evolution of Different Genotypes over Time and Recent Emergence of a Novel  
Genotype due to Natural Recombination. *J Virol* **85**:11325-11337.
24. **Lau SKP, Poon RWS, Wong BHL, Wang M, Huang Y, Xu H, Guo R, Li KSM, Gao  
K, Chan KH, Zheng BJ, Woo PCY, Yuen KY.** 2010. Coexistence of Different  
Genotypes in the Same Bat and Serological Characterization of Rousettus Bat  
Coronavirus HKU9 Belonging to a Novel Betacoronavirus Subgroup. *J Virol* **84**:11385-  
11394.
25. **Lau SKP, Woo PCY, Li KSM, Tsang AKL, Fan RYY, Luk HKH, Cai J-P, Chan K-  
H, Zheng B-J, Wang M, Yuen K-Y.** 2014. Discovery of a Novel Coronavirus, China  
Rattus Coronavirus HKU24, from Norway Rats Supports the Murine Origin of  
Betacoronavirus 1 and Has Implications for the Ancestor of Betacoronavirus Lineage A.  
*J Virol* **89**:3076-3092.
26. **Guan Y.** 2003. Isolation and Characterization of Viruses Related to the SARS  
Coronavirus from Animals in Southern China. *Science* **302**:276-278.
27. **Lau SK, Woo PC, Li KS, Huang Y, Tsoi HW, Wong BH, Wong SS, Leung SY, Chan  
KH, Yuen KY.** 2005. Severe acute respiratory syndrome coronavirus-like virus in  
Chinese horseshoe bats. *Proc Natl Acad Sci U S A* **102**:14040-14045.
28. **Li W.** 2005. Bats Are Natural Reservoirs of SARS-Like Coronaviruses. *Science*  
**310**:676-679.
29. **Ge XY, Li JL, Yang XL, Chmura AA, Zhu G, Epstein JH, Mazet JK, Hu B, Zhang  
W, Peng C, Zhang YJ, Luo CM, Tan B, Wang N, Zhu Y, Crameri G, Zhang SY,**



- 453        **Wang LF, Daszak P, Shi ZL.** 2013. Isolation and characterization of a bat SARS-like  
454        coronavirus that uses the ACE2 receptor. *Nature* **503**:535-538.
- 455    30.    **Lau SK, Feng Y, Chen H, Luk HK, Yang WH, Li KS, Zhang YZ, Huang Y, Song**  
456        **ZZ, Chow WN, Fan RY, Ahmed SS, Yeung HC, Lam CS, Cai JP, Wong SS, Chan**  
457        **JF, Yuen KY, Zhang HL, Woo PC.** 2015. Severe Acute Respiratory Syndrome (SARS)  
458        Coronavirus ORF8 Protein Is Acquired from SARS-Related Coronavirus from Greater  
459        Horseshoe Bats through Recombination. *J Virol* **89**:10532-10547.
- 460    31.    **Hu B, Zeng LP, Yang XL, Ge XY, Zhang W, Li B, Xie JZ, Shen XR, Zhang YZ,**  
461        **Wang N, Luo DS, Zheng XS, Wang MN, Daszak P, Wang LF, Cui J, Shi ZL.** 2017.  
462        Discovery of a rich gene pool of bat SARS-related coronaviruses provides new insights  
463        into the origin of SARS coronavirus. *PLoS Pathog* **13**:e1006698.
- 464    32.    **Song HD, Tu CC, Zhang GW, Wang SY, Zheng K, Lei LC, Chen QX, Gao YW,**  
465        **Zhou HQ, Xiang H, Zheng HJ, Chern SWW, Cheng F, Pan CM, Xuan H, Chen SJ,**  
466        **Luo HM, Zhou DH, Liu YF, He JF, Qin PZ, Li LH, Ren YQ, Liang WJ, Yu YD,**  
467        **Anderson L, Wang M, Xu RH, Wu XW, Zheng HY, Chen JD, Liang G, Gao Y, Liao**  
468        **M, Fang L, Jiang LY, Li H, Chen F, Di B, He LJ, Lin JY, Tong S, Kong X, Du L,**  
469        **Hao P, Tang H, Bernini A, Yu XJ, Spiga O, Guo ZM, et al.** 2005. Cross-host  
470        evolution of severe acute respiratory syndrome coronavirus in palm civet and human.  
471        *Proc Natl Acad Sci U S A* **102**:2430-2435.
- 472    33.    **Chinese SMEC.** 2004. Molecular evolution of the SARS coronavirus during the course  
473        of the SARS epidemic in China. *Science* **303**:1666-1669.

34. **Lau SKP, Li KSM, Tsang AKL, Shek CT, Wang M, Choi GKY, Guo R, Wong BHL, Poon RWS, Lam CSF, Wang SYH, Fan RYY, Chan KH, Zheng BJ, Woo PCY, Yuen KY.** 2012. Recent Transmission of a Novel Alphacoronavirus, Bat Coronavirus HKU10, from Leschenault's Rousettes to Pomona Leaf-Nosed Bats: First Evidence of Interspecies Transmission of Coronavirus between Bats of Different Suborders. *J Virol* **86**:11906-11918.
35. **Lau SKP, Woo PCY, Li KSM, Huang Y, Wang M, Lam CSF, Xu H, Guo R, Chan K-h, Zheng B-j, Yuen K-y.** 2007. Complete genome sequence of bat coronavirus HKU2 from Chinese horseshoe bats revealed a much smaller spike gene with a different evolutionary lineage from the rest of the genome. *Virology* **367**:428-439.
36. **Woo PC, Lau SK, Lam CS, Tsang AK, Hui SW, Fan RY, Martelli P, Yuen KY.** 2014. Discovery of a novel bottlenose dolphin coronavirus reveals a distinct species of marine mammal coronavirus in Gammacoronavirus. *J Virol* **88**:1318-1331.
37. **Zhang J, Guy JS, Snijder EJ, Denniston DA, Timoney PJ, Balasuriya UB.** 2007. Genomic characterization of equine coronavirus. *Virology* **369**:92-104.
38. **Hasoksuz M, Alekseev K, Vlasova A, Zhang X, Spiro D, Halpin R, Wang S, Ghedin E, Saif LJ.** 2007. Biologic, antigenic, and full-length genomic characterization of a bovine-like coronavirus isolated from a giraffe. *J Virol* **81**:4981-4990.
39. **Jin L, Cebra CK, Baker RJ, Mattson DE, Cohen SA, Alvarado DE, Rohrmann GF.** 2007. Analysis of the genome sequence of an alpaca coronavirus. *Virology* **365**:198-203.
40. **Crossley BM, Barr BC, Magdesian KG, Ing M, Mora D, Jensen D, Loretto AP, McConnell T, Mock R.** 2010. Identification of a novel coronavirus possibly associated

- with acute respiratory syndrome in alpacas (*Vicugna pacos*) in California, 2007. *J Vet Diagn Invest* **22**:94-97.
41. **Reusken CB, Haagmans BL, Muller MA, Gutierrez C, Godeke GJ, Meyer B, Muth D, Raj VS, Smits-De Vries L, Corman VM, Drexler JF, Smits SL, El Tahir YE, De Sousa R, van Beek J, Nowotny N, van Maanen K, Hidalgo-Hermoso E, Bosch BJ, Rottier P, Osterhaus A, Gortazar-Schmidt C, Drosten C, Koopmans MP.** 2013. Middle East respiratory syndrome coronavirus neutralising serum antibodies in dromedary camels: a comparative serological study. *Lancet Infect Dis* **13**:859-866.
42. **Haagmans BL, Al Dhahiry SH, Reusken CB, Raj VS, Galiano M, Myers R, Godeke GJ, Jonges M, Farag E, Diab A, Ghobashy H, Alhajri F, Al-Thani M, Al-Marri SA, Al Romaihi HE, Al Khal A, Bermingham A, Osterhaus AD, Alhajri MM, Koopmans MP.** 2013. Middle East respiratory syndrome coronavirus in dromedary camels: an outbreak investigation. *Lancet Infect Dis* doi:10.1016/S1473-3099(13)70690-X.
43. **Chan JFW, Lau SKP, To KKW, Cheng VCC, Woo PCY, Yuen K-Y.** 2015. Middle East Respiratory Syndrome Coronavirus: Another Zoonotic Betacoronavirus Causing SARS-Like Disease. *Clin Microbiol Rev* **28**:465-522.
44. **Woo PCY, Lau SKP, Li KSM, Poon RWS, Wong BHL, Tsoi H-w, Yip BCK, Huang Y, Chan K-h, Yuen K-y.** 2006. Molecular diversity of coronaviruses in bats. *Virology* **351**:180-187.
45. **Lau SK, Li KS, Tsang AK, Lam CS, Ahmed S, Chen H, Chan KH, Woo PC, Yuen KY.** 2013. Genetic Characterization of Betacoronavirus Lineage C Viruses in Bats Reveals Marked Sequence Divergence in the Spike Protein of *Pipistrellus* Bat

Coronavirus HKU5 in Japanese Pipistrelle: Implications for the Origin of the Novel  
Middle East Respiratory Syndrome Coronavirus. *J Virol* **87**:8638-8650.

46. **Yang L, Wu Z, Ren X, Yang F, Zhang J, He G, Dong J, Sun L, Zhu Y, Zhang S, Jin Q.** 2014. MERS-related betacoronavirus in *Vespertilio superans* bats, China. *Emerg Infect Dis* **20**:1260-1262.

47. **Corman VM, Ithete NL, Richards LR, Schoeman MC, Preiser W, Drosten C, Drexler JF.** 2014. Rooting the phylogenetic tree of middle East respiratory syndrome coronavirus by characterization of a conspecific virus from an African bat. *J Virol* **88**:11297-11303.

48. **Anthony SJ, Gilardi K, Menachery VD, Goldstein T, Ssebide B, Mbabazi R, Navarrete-Macias I, Liang E, Wells H, Hicks A, Petrosov A, Byarugaba DK, Debbink K, Dinno KH, Scobey T, Randell SH, Yount BL, Cranfield M, Johnson CK, Baric RS, Lipkin WI, Mazet JA.** 2017. Further Evidence for Bats as the Evolutionary Source of Middle East Respiratory Syndrome Coronavirus. *MBio* **8**.

49. **Geldenhuys M, Mortlock M, Weyer J, Bezuidt O, Seamark ECJ, Kearney T, Gleasner C, Erkkila TH, Cui H, Markotter W.** 2018. A metagenomic viral discovery approach identifies potential zoonotic and novel mammalian viruses in *Neoromicia* bats within South Africa. *PLoS One* **13**:e0194527.

50. **Lau SKP, Zhang L, Luk HKH, Xiong L, Peng X, Li KSM, He X, Zhao PS, Fan RYY, Wong ACP, Ahmed SS, Cai JP, Chan JFW, Sun Y, Jin D, Chen H, Lau TCK, Kok RKH, Li W, Yuen KY, Woo PCY.** 2018. Receptor usage of a novel bat lineage C

betacoronavirus reveals evolution of MERS-related coronavirus spike proteins for human DPP4 binding. J Infect Dis doi:10.1093/infdis/jiy018.

51. **Corman VM, Kallies R, Philipps H, Gopner G, Muller MA, Eckerle I, Brunink S, Drosten C, Drexler JF.** 2014. Characterization of a novel betacoronavirus related to middle East respiratory syndrome coronavirus in European hedgehogs. J Virol **88**:717-724.
52. **Yang Y, Du L, Liu C, Wang L, Ma C, Tang J, Baric RS, Jiang S, Li F.** 2014. Receptor usage and cell entry of bat coronavirus HKU4 provide insight into bat-to-human transmission of MERS coronavirus. Proc Natl Acad Sci U S A **111**:12516-12521.
53. **Wang Q, Qi J, Yuan Y, Xuan Y, Han P, Wan Y, Ji W, Li Y, Wu Y, Wang J, Iwamoto A, Woo PC, Yuen KY, Yan J, Lu G, Gao GF.** 2014. Bat origins of MERS-CoV supported by bat coronavirus HKU4 usage of human receptor CD26. Cell Host Microbe **16**:328-337.
54. **Cai Y, Yu SQ, Postnikova EN, Mazur S, Bernbaum JG, Burk R, Zhang T, Radoshitzky SR, Muller MA, Jordan I, Bollinger L, Hensley LE, Jahrling PB, Kuhn JH.** 2014. CD26/DPP4 cell-surface expression in bat cells correlates with bat cell susceptibility to Middle East respiratory syndrome coronavirus (MERS-CoV) infection and evolution of persistent infection. PLoS One **9**:e112060.
55. **Munster VJ, Adney DR, van Doremalen N, Brown VR, Miazgowiec KL, Milne-Price S, Bushmaker T, Rosenke R, Scott D, Hawkinson A, de Wit E, Schountz T, Bowen RA.** 2016. Replication and shedding of MERS-CoV in Jamaican fruit bats (*Artibeus jamaicensis*). Sci Rep **6**:21878.

56. **Chan JF, Chan KH, Choi GK, To KK, Tse H, Cai JP, Yeung ML, Cheng VC, Chen H, Che XY, Lau SK, Woo PC, Yuen KY.** 2013. Differential cell line susceptibility to the emerging novel human betacoronavirus 2c EMC/2012: implications for disease pathogenesis and clinical manifestation. *J Infect Dis* **207**:1743-1752.
57. **Eckerle I, Corman VM, Muller MA, Lenk M, Ulrich RG, Drosten C.** 2014. Replicative Capacity of MERS Coronavirus in Livestock Cell Lines. *Emerg Infect Dis* **20**:276-279.
58. **Vergara-Alert J, van den Brand JM, Widagdo W, Munoz Mt, Raj S, Schipper D, Solanes D, Cordon I, Bensaid A, Haagmans BL, Segales J.** 2017. Livestock Susceptibility to Infection with Middle East Respiratory Syndrome Coronavirus. *Emerg Infect Dis* **23**:232-240.
59. **Banerjee A, Rapin N, Miller M, Griebel P, Zhou Y, Munster V, Misra V.** 2016. Generation and Characterization of Eptesicus fuscus (Big brown bat) kidney cell lines immortalized using the Myotis polyomavirus large T-antigen. *J Virol Methods* **237**:166-173.
60. **Lau SKP, Wong ACP, Lau TCK, Woo PCY.** 2017. Molecular Evolution of MERS Coronavirus: Dromedaries as a Recent Intermediate Host or Long-Time Animal Reservoir? *Int J Mol Sci* **18**.
61. **Cotten M, Watson SJ, Kellam P, Al-Rabeeah AA, Makhdoom HQ, Assiri A, Al-Tawfiq JA, Alhakeem RF, Madani H, AlRabiah FA, Al Hajjar S, Al-nassir WN, Albarrak A, Flemban H, Balkhy HH, Alsubaie S, Palser AL, Gall A, Bashford-Rogers R, Rambaut A, Zumla AI, Memish ZA.** 2013. Transmission and evolution of

- the Middle East respiratory syndrome coronavirus in Saudi Arabia: a descriptive genomic study. *Lancet* **382**:1993-2002.
62. **Lau SK, Wernery R, Wong EY, Joseph S, Tsang AK, Patteril NA, Elizabeth SK, Chan KH, Muhammed R, Kinne J, Yuen KY, Wernery U, Woo PC.** 2016. Polyphyletic origin of MERS coronaviruses and isolation of a novel clade A strain from dromedary camels in the United Arab Emirates. *Emerg Microbes Infect* **5**:e128.
63. **Chu DKW, Hui KPY, Perera R, Miguel E, Niemeyer D, Zhao J, Channappanavar R, Dudas G, Oladipo JO, Traore A, Fassi-Fihri O, Ali A, Demissie GF, Muth D, Chan MCW, Nicholls JM, Meyerholz DK, Kuranga SA, Mamo G, Zhou Z, So RTY, Hemida MG, Webby RJ, Roger F, Rambaut A, Poon LLM, Perlman S, Drosten C, Chevalier V, Peiris M.** 2018. MERS coronaviruses from camels in Africa exhibit region-dependent genetic diversity. *Proc Natl Acad Sci U S A* **115**:3144-3149.
64. **Lu G, Hu Y, Wang Q, Qi J, Gao F, Li Y, Zhang Y, Zhang W, Yuan Y, Bao J, Zhang B, Shi Y, Yan J, Gao GF.** 2013. Molecular basis of binding between novel human coronavirus MERS-CoV and its receptor CD26. *Nature* **500**:227-231.
65. **Wang N, Shi X, Jiang L, Zhang S, Wang D, Tong P, Guo D, Fu L, Cui Y, Liu X, Arledge KC, Chen YH, Zhang L, Wang X.** 2013. Structure of MERS-CoV spike receptor-binding domain complexed with human receptor DPP4. *Cell Res* **23**:986-993.
66. **Hon CC, Lam TY, Shi ZL, Drummond AJ, Yip CW, Zeng F, Lam PY, Leung FCC.** 2007. Evidence of the Recombinant Origin of a Bat Severe Acute Respiratory Syndrome (SARS)-Like Coronavirus and Its Implications on the Direct Ancestor of SARS Coronavirus. *J Virol* **82**:1819-1826.

67. **Li W, Moore MJ, Vasilieva N, Sui J, Wong SK, Berne MA, Somasundaran M, Sullivan JL, Luzuriaga K, Greenough TC, Choe H, Farzan M.** 2003. Angiotensin-converting enzyme 2 is a functional receptor for the SARS coronavirus. *Nature* **426**:450-454.
68. **Corman VM, Baldwin HJ, Tatenno AF, Zerbinati RM, Annan A, Owusu M, Nkrumah EE, Maganga GD, Oppong S, Adu-Sarkodie Y, Vallo P, da Silva Filho LV, Leroy EM, Thiel V, van der Hoek L, Poon LL, Tschapka M, Drosten C, Drexler JF.** 2015. Evidence for an Ancestral Association of Human Coronavirus 229E with Bats. *J Virol* **89**:11858-11870.
69. **Corman VM, Eckerle I, Memish ZA, Liljander AM, Dijkman R, Jonsdottir H, Juma Ngeiywa KJ, Kamau E, Younan M, Al Masri M, Assiri A, Gluecks I, Musa BE, Meyer B, Muller MA, Hilali M, Bornstein S, Wernery U, Thiel V, Jores J, Drexler JF, Drosten C.** 2016. Link of a ubiquitous human coronavirus to dromedary camels. *Proc Natl Acad Sci U S A* **113**:9864-9869.
70. **Tao Y, Shi M, Chommanard C, Queen K, Zhang J, Markotter W, Kuzmin IV, Holmes EC, Tong S.** 2017. Surveillance of Bat Coronaviruses in Kenya Identifies Relatives of Human Coronaviruses NL63 and 229E and Their Recombination History. *J Virol* **91**.
71. **Crameri G, Todd S, Grimley S, McEachern JA, Marsh GA, Smith C, Tachedjian M, De Jong C, Virtue ER, Yu M, Bulach D, Liu JP, Michalski WP, Middleton D, Field HE, Wang LF.** 2009. Establishment, immortalisation and characterisation of pteropid bat cell lines. *PLoS One* **4**:e8266.



627    72.    **Lau SK, Lau CC, Chan KH, Li CP, Chen H, Jin DY, Chan JF, Woo PC, Yuen KY.**  
628            2013. Delayed induction of proinflammatory cytokines and suppression of innate  
629            antiviral response by the novel Middle East respiratory syndrome coronavirus:  
630            implications for pathogenesis and treatment. J Gen Virol doi:10.1099/vir.0.055533-0.  
631

## LEGENDS TO FIGURES

**FIG 1** The 12 bat cell lines (PAK: *Pipistrellus abramus* kidney, PAL *Pipistrellus abramus* lung, RSK: *Rhinolophus sinicus* kidney, RSL: *Rhinolophus sinicus* lung, MRK: *Myotis ricketti* kidney, MRL: *Myotis ricketti* lung, TPK: *Tylonycteris pachypus* kidney, TPL: *Tylonycteris pachypus* lung, HPK: *Hipposideros pomona* kidney, RLK: *Rousettus leschenaultii* kidney, RLL: *Rousettus leschenaultii* lung, MPK: *Miniopterus pusillus* kidney) and Vero cells were subject to infection by MERS-CoV EMC/2012 (belonging to clade A1) with MOI of 1 (A). Culture supernatants were harvested at day 0 and 5 post infection. Viral titers were determined by real-time quantitative RT-PCR. Viral load was expressed as  $\log_{10}$  copies/mL. Error bars indicate the standard deviation of triplicate samples. The five bat cell lines susceptible to MERS-CoV EMC/2012 infection with  $\geq 1 \log_{10}$  increase in viral load at day 5 were marked with red triangles. They were subject to infection by three other MERS-CoV strains isolated from camels in Dubai, D998/15 (belonging to clade A2) (B), D1189.1/15 (C) and D1271.1/15 (D) (belonging to clade B3) (B). Different MERS-CoV strains displayed different infectivities in these five bat cells. (\* $P < 0.05$ ; \*\* $P < 0.01$ ; \*\*\* $P < 0.001$ )

**FIG 2** Cytopathic effects (CPE) were observed in infected *M. ricketti* lung, *R. sinicus* lung and Vero cells on 5 days post infection. CPE was compared between *Myotis ricketti* lung (immortalized) cells that were uninfected (control) (A), and infected with Dubai camel MERS strains D998/15 (B), D1189.1/15 (C) & D1271.1/15. CPE was compared between *Rhinolophus sinicus* lung (immortalized) cells that were uninfected (control) (E), and infected with Dubai camel MERS strains D998/15 (F), D1189.1/15 (G) & D1271.1/15 (H). CPE was compared

between Vero cells that were uninfected (control) (I), and infected with Dubai camel MERS strains D998/15 (G), D1189.1/15 (K) & D1271.1/15 (L).

**FIG 3** The 12 bat cell lines (PAK: *Pipistrellus abramus* kidney, PAL *Pipistrellus abramus* lung, RSK: *Rhinolophus sinicus* kidney, RSL: *Rhinolophus sinicus* lung, MRK: *Myotis ricketti* kidney, MRL: *Myotis ricketti* lung, TPK: *Tylonycteris pachypus* kidney, TPL: *Tylonycteris pachypus* lung, HPK: *Hipposideros pomona* kidney, RLK: *Rousettus leschenaultii* kidney, RLL: *Rousettus leschenaultii* lung, MPK: *Miniopterus pusillus* kidney) and Vero/HFL cells were subject to infection by SARS-CoV with MOI of 1 (A) and HCoV-229E with MOI of 0.01(B). Culture supernatants were harvested at day 0 and 5 post infection. Viral titers were determined by real-time quantitative RT-PCR. Viral load was expressed as log<sub>10</sub> copies/mL. Error bars indicate the standard deviation of triplicate samples. Only RSK cells can support SARS-CoV infection with  $\geq 1$  log<sub>10</sub> increase in viral load at day 5 (blue triangle) and none of the 12 bat cell lines support HCoV-229E infection. (\* $P < 0.05$ ; \*\* $P < 0.01$ ; \*\*\* $P < 0.001$ )

**FIG 4** Phylogenetic analyses of partial dpp4 mRNA sequences of human, camels, bats and other animals (A). The trees were constructed by Neighbor-Joining method using JTT substitution models and bootstrap values calculated from 1000 trees. Only bootstrap values >70% are shown. 112 aa positions were included in the analyses. The scale bars represent 20 substitutions per site. Bat DPP4s that are sequenced in this study are labelled with black circles. Comparison of critical amino acid residues in DPP4 from different animal host for receptor binding in the region of residues 229-346 with respect to human DPP4 (B).

**FIG 5** DPP4 expression analysis of bat cell lines (A). mRNA levels of DPP4 were measured in various bat cells extracts by RT-qPCR and plotted relative to Vero cells, normalized by  $\beta$ -actin

675 mRNA levels. The mRNA levels of DPP4 were compared between susceptible and non-  
 676 susceptible bat cell lines (B). Statistical significance was assessed by Student's t test  $P < 0.05$ .  
 677 **FIG 6** Infection assay of *T. pachypus* lung and kidney cells with tpDPP4 overexpression. Cells  
 678 were infected with MERS-CoV at a multiplicity of infection (MOI) of 1 for 5 days.  
 679 Determination of MERS-CoV viral load in supernatant (n = 3) by RT-qPCR with normalisation  
 680 to beta-actin (represented by bar). Determination of tpDPP4 expression in cell lysates (n = 3) by  
 681 RT-qPCR with normalisation to beta-actin (represented by dot). (\* $P < 0.05$ , \*\* $P < 0.01$ ,  
 682 \*\*\* $P < 0.001$ )

683 Table 1. Cell lines used in the present study

684

| Organism                                                | Site of origin | Source                 |
|---------------------------------------------------------|----------------|------------------------|
| Bat                                                     |                |                        |
| <i>Hipposideros pomona</i> (Pomona roundleaf bat)       | Kidney         | In-house development   |
| <i>Miniopterus pusillus</i> (Lesser bent-winged bat)    | Kidney         | In-house development   |
| <i>Myotis ricketti</i> (Rickett's big-footed bat)       | Kidney         | In-house development   |
| <i>Myotis ricketti</i> (Rickett's big-footed bat)       | Lung           | In-house development   |
| <i>Pipistrellus abramus</i> (Japanese pipistrelle)      | Kidney         | In-house development   |
| <i>Pipistrellus abramus</i> (Japanese pipistrelle)      | Lung           | In-house development   |
| <i>Rhinolophus sinicus</i> (Chinese horseshoe bat)      | Kidney         | In-house development   |
| <i>Rhinolophus sinicus</i> (Chinese horseshoe bat)      | Lung           | In-house development   |
| <i>Tylonycteris pachypus</i> (Lesser bamboo bat)        | Kidney         | In-house development   |
| <i>Tylonycteris pachypus</i> (Lesser bamboo bat)        | Lung           | In-house development   |
| <i>Rousettus leschenaultii</i> (Leschenault's rousette) | Kidney         | In-house development   |
| <i>Rousettus leschenaultii</i> (Leschenault's rousette) | Lung           | In-house development   |
| Human                                                   |                |                        |
| <i>Homo sapiens</i>                                     | Embryonic      | HFL                    |
|                                                         | Lung           | (In-house development) |
| Monkey                                                  |                |                        |
| <i>Cercopithecus aethiops</i> (African green monkey)    | Kidney         | Vero (ATCC CCL-81)     |

685

686

687 Table 2. Primers used for RT-qPCR in this study

688

| Target           | Primers                            |                                                                                                                                                           |                                                      |
|------------------|------------------------------------|-----------------------------------------------------------------------------------------------------------------------------------------------------------|------------------------------------------------------|
|                  | Forward                            | Reverse                                                                                                                                                   | Probe                                                |
| MERS-CoV N gene  | 5' - CAAAACCTTCCCTAAGAAGGAAAAG -3' | 5'- GCTCCTTTGGAGGTTTCAGACAT -3'                                                                                                                           | (5'- (FAM)ACAAAAGGCACCAAAAGAAGAA TCAACAGACC(BHQ1)-3' |
| SARS-CoV N gene  | 5'- ACCAGAATGGAGGACGCAATG-3'       | 5'- GCTGTGAACCAAGACGCAGTATTA T-3'                                                                                                                         | 5'-(FAM)ACCCCAAGGTTTACCC(NFQ)-3'                     |
| HCoV-229E N gene | 5'-CAGTCAAATGGGCTGATGCA-3'         | 5'- AAAGGGCTATAAAGAGAATAAGGT ATTCT-3'                                                                                                                     | 5'- (FAM)CCCTGACGACCACGTTGTGGTTC A(BHQ1)-3           |
| DPP4             | 5'- TGATCTTGCCTCCTCATTTTGATAA-3'   | 5'-GTAACCACTTCCTCTGCCATCAA-3' or 5'- GTAACCACTTCCTCTGCCGTCAA-3' (for <i>Rousettus</i> cell lines)                                                         | 5' - (FAM)CCACMTTCAMACTCARYTGGGC TACTTACC(BHQ1) -3'  |
| $\beta$ -actin   | 5'- CTCTTCCAGCCCTCCTTCCT -3'       | 5'- TTCATCGTGCTGGGAGCC-3' or 5'- TTCATTGTGCTGGGAGCC-3' (for <i>Rousettus</i> cell lines) or 5'- TTCATGGTGCTGGGGGCC-3' (for <i>Rhinolophus</i> cell lines) | 5'- (FAM)CATGAAGTGYGACGTBGACATC CG(BHQ1)-3'          |

689

A

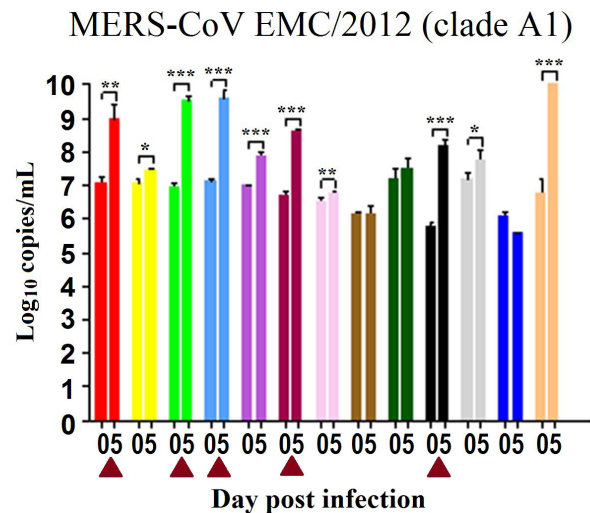

B

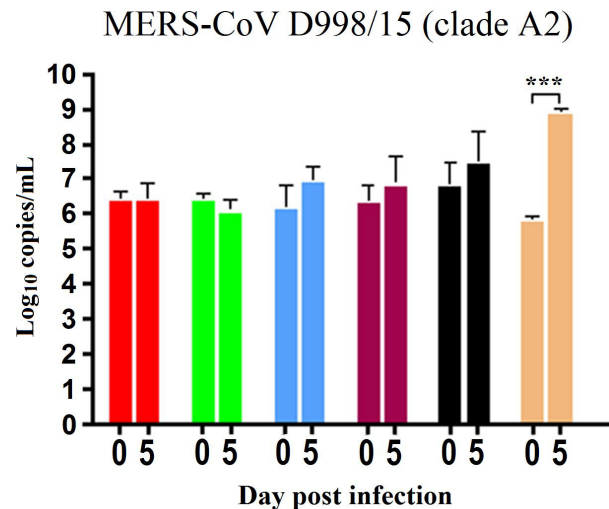

C

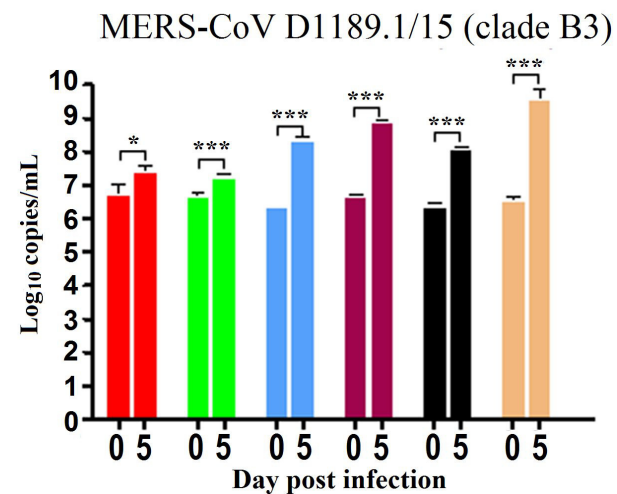

D

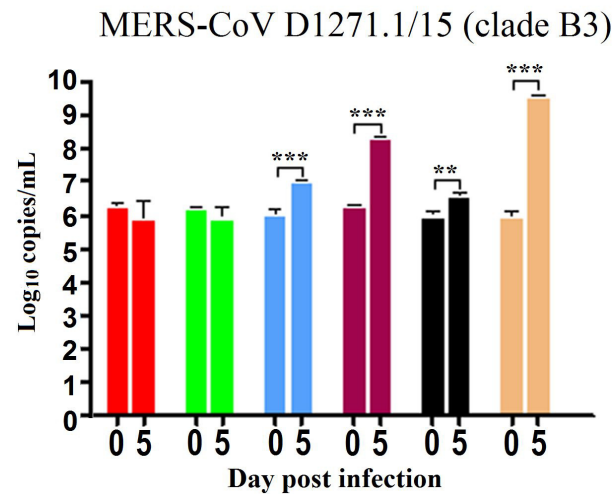

- █ *Pipistrellus abramus* kidney (Immortalized)
- █ *Pipistrellus abramus* lung
- █ *Rhinolophus sinicus* kidney
- █ *Rhinolophus sinicus* lung (Immortalized)
- █ *Myotis ricketti* kidney
- █ *Myotis ricketti* lung (Immortalized)
- █ *Tylonycteris pachypus* kidney
- █ *Tylonycteris pachypus* lung
- █ *Hipposideros pomona* kidney
- █ *Rousettus leschenaulti* kidney (Immortalized)
- █ *Rousettus leschenaulti* lung
- █ *Miniopterus pusillus* kidney (Immortalized)
- █ Vero

\* $P < 0.05$ , \*\* $P < 0.01$ , \*\*\* $P < 0.001$



Control

D998/15 clade A

D1189.1/15 clade B

D1271.1/15 clade B

*Myotis ricketti* lung

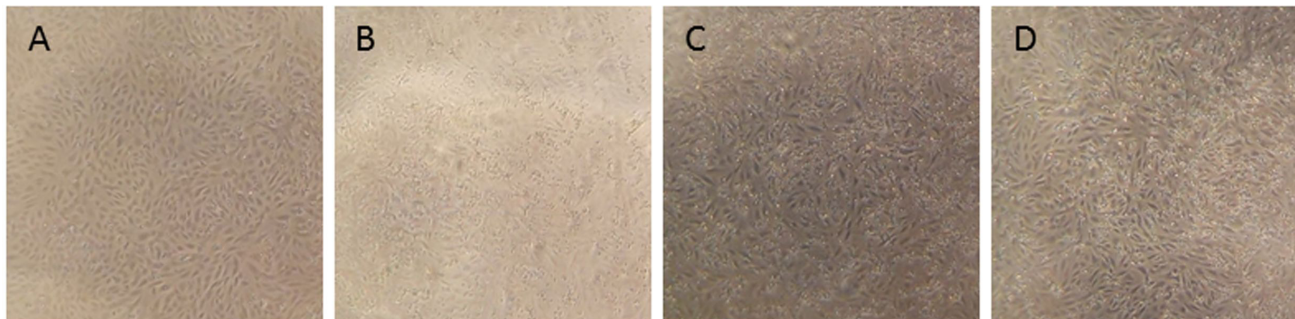

*Rhinolophus sinicus* lung

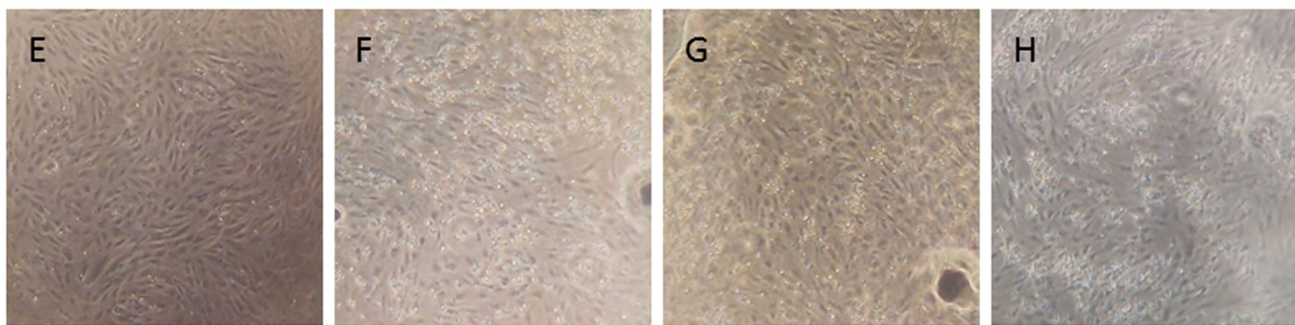

Vero

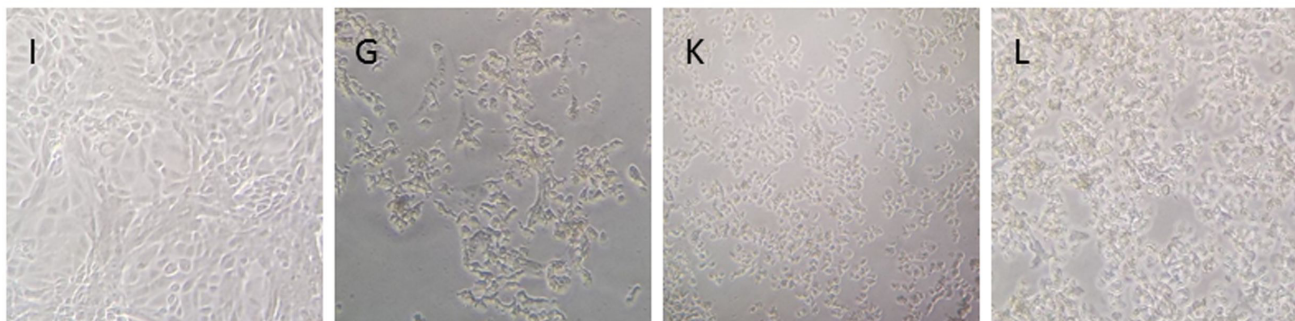



$\text{Log}_{10} \text{copies/mL}$ 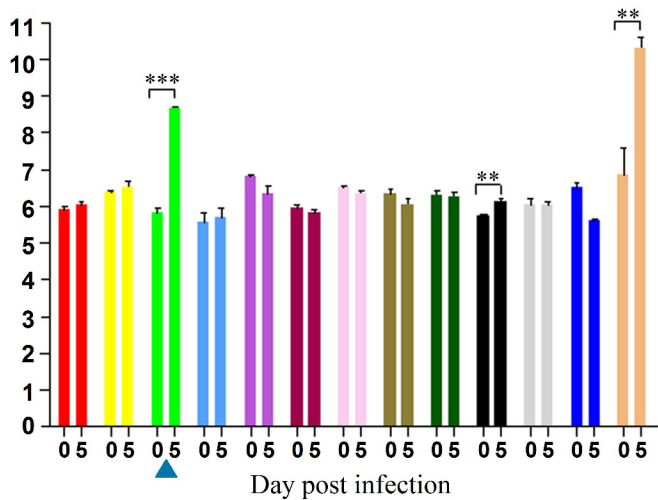

\* $P<0.05$ , \*\* $P<0.01$ , \*\*\* $P<0.001$

Log<sub>10</sub> copies/mL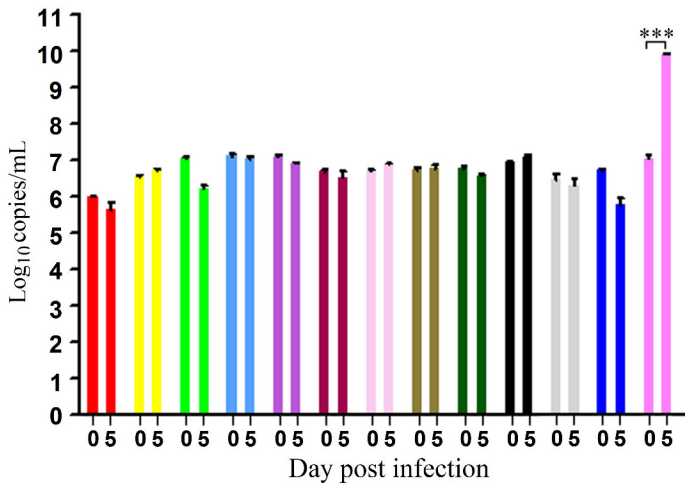

- *Pipistrellus abramus* kidney (Immortalized)
- *Pipistrellus abramus* lung
- *Rhinolophus sinicus* kidney
- *Rhinolophus sinicus* lung (Immortalized)
- *Myotis ricketti* kidney
- *Myotis ricketti* lung (Immortalized)
- *Tylonycteris pachypus* kidney
- *Tylonycteris pachypus* lung
- *Hipposideros pomona* kidney
- *Rousettus leschenaulti* kidney (Immortalized)
- *Rousettus leschenaulti* lung
- *Miniopterus pusillus* kidney (Immortalized)
- Vero
- HFL

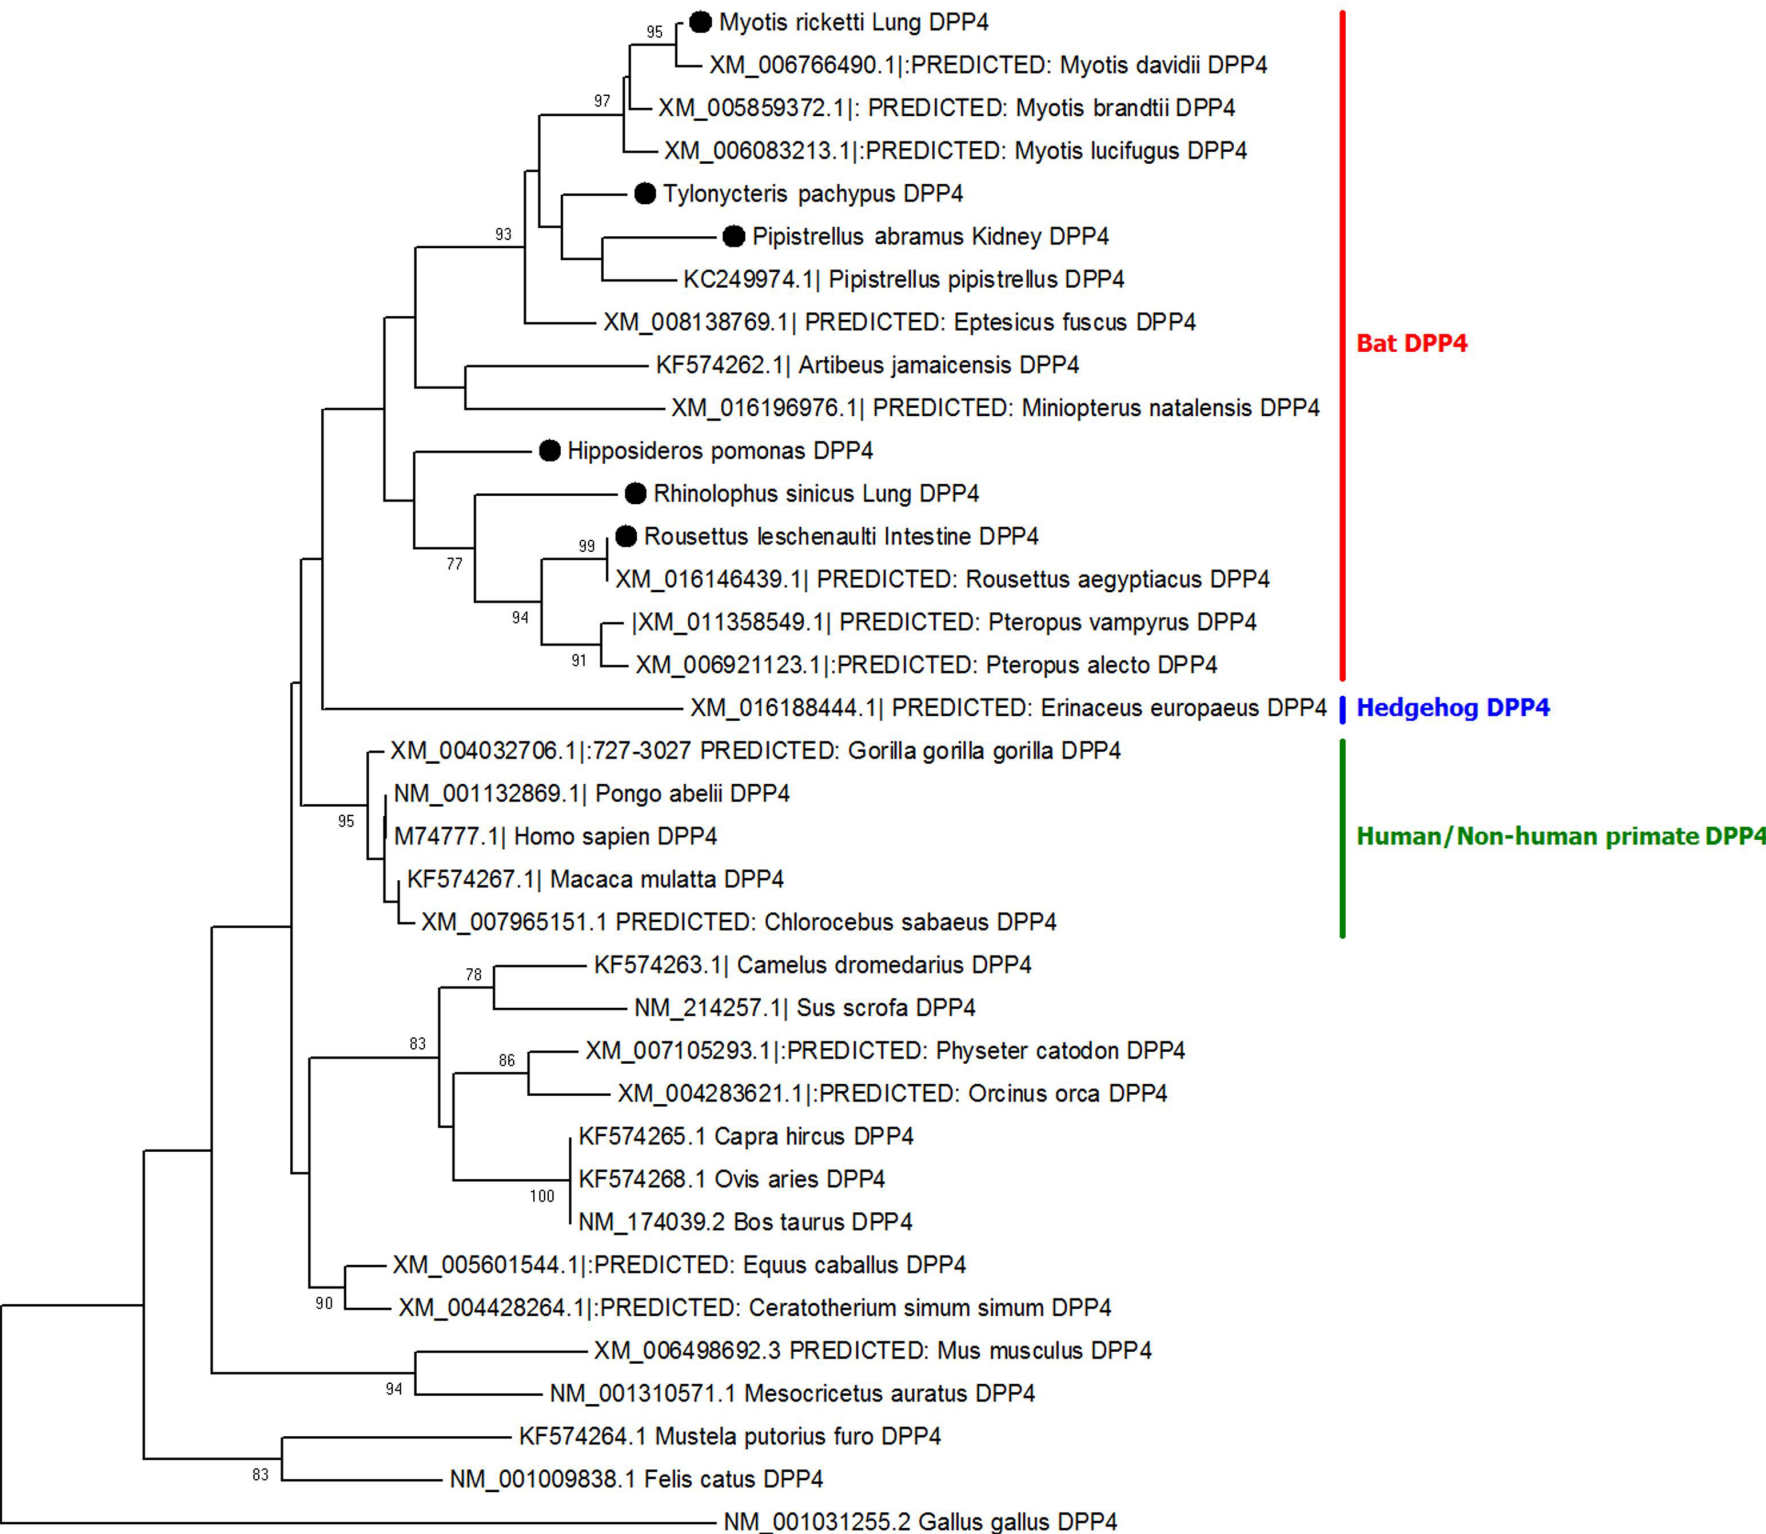

Bat DPP4

Hedgehog DPP4

Human/Non-human primate DPP4

0.05

## Amino acid residue (with respect to human DPP4)

| 229 | 267 | 286 | 288 | 291 | 294 | 295 | 298 | 317 | 322 | 336 | 341 | 344 | 346 |
|-----|-----|-----|-----|-----|-----|-----|-----|-----|-----|-----|-----|-----|-----|
|-----|-----|-----|-----|-----|-----|-----|-----|-----|-----|-----|-----|-----|-----|

| Animal Species                   | Susceptible to MERS-CoV* |   |   |   |   |   |   |   |   |   |   |   |   |   |   |
|----------------------------------|--------------------------|---|---|---|---|---|---|---|---|---|---|---|---|---|---|
| Human                            | +                        | N | K | Q | T | A | L | I | H | R | Y | R | V | Q | I |
| Rhesus macaque                   | +                        | . | . | . | . | . | . | . | . | . | . | . | . | . | . |
| Common marmoset                  | +                        | . | . | . | . | . | . | . | . | . | . | . | . | . | . |
| Camel                            | +                        | . | . | . | V | . | . | . | . | . | . | . | . | . | . |
| Horse                            | +                        | . | . | . | . | . | . | . | . | . | . | . | . | . | . |
| Pig                              | +                        | . | . | . | V | . | . | . | . | . | . | . | . | . | . |
| Rabbit                           | +                        | . | R | . | . | . | . | . | . | . | . | . | . | . | . |
| Sheep                            | +                        | . | . | . | V | G | . | . | . | . | . | . | . | . | . |
| Cow                              | +                        | . | . | . | V | G | . | . | . | . | . | . | . | . | . |
| Goat                             | +                        | . | . | . | V | G | . | . | . | . | . | . | . | . | . |
| <i>Tylonycteris pachypus</i>     | -                        | . | . | . | . | . | . | K | . | . | . | . | . | . | . |
| <i>Pipistrellus abramus</i>      | +                        | D | . | . | . | . | . | . | . | . | . | T | . | . | . |
| <i>Pipistrellus pipistrellus</i> | +                        | . | . | . | . | . | . | T | . | . | . | K | . | . | . |
| <i>Myotis ricketti</i>           | +                        | . | . | . | V | . | . | . | . | . | . | K | . | . | . |
| <i>Rousettus leschenaulti</i>    | +                        | . | . | . | V | . | . | . | . | . | . | S | . | . | M |
| <i>Rhinolophus sinicus</i>       | +                        | . | . | . | V | . | . | . | . | . | . | G | . | . | . |
| <i>Hipposideros pomona</i>       | -                        | . | . | . | V | . | . | . | . | . | . | . | . | . | . |
| Hamster                          | -                        | . | . | . | . | E | . | T | . | . | . | T | L | . | V |
| Mouse                            | -                        | . | . | . | P | . | A | R | . | . | . | T | S | . | V |
| Ferret                           | -                        | . | . | E | . | D | S | T | Y | . | . | S | E | E | T |

\*In vitro, in vivo or natural infection

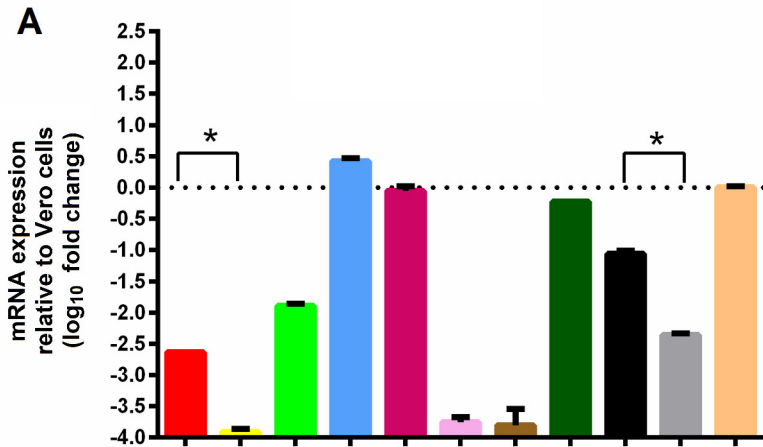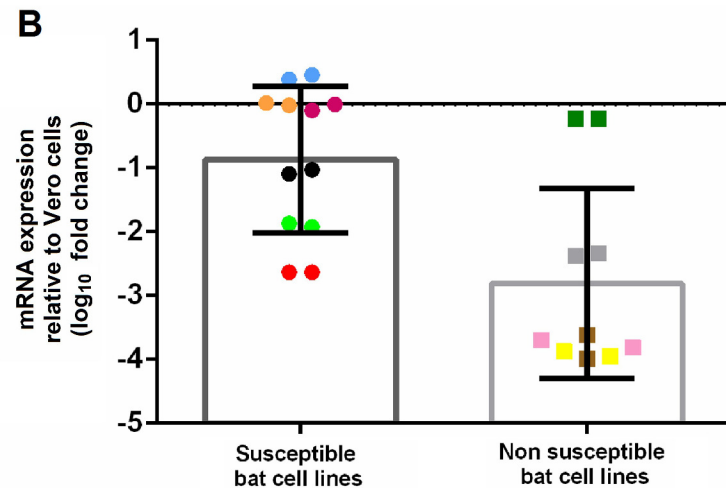

- Pipistrellus abramus* kidney (Immortalized)
- Pipistrellus abramus* lung
- Rhinolophus sinicus* kidney
- Rhinolophus sinicus* lung (Immortalized)
- Myotis ricketti* kidney
- Myotis ricketti* lung (Immortalized)
- Tylonycteris pachypus* kidney
- Tylonycteris pachypus* lung
- Hipposideros pomona* kidney
- Rousettus leschenaulti* kidney (Immortalized)
- Rousettus leschenaulti* lung
- Miniopterus pusillus* kidney (Immortalized)
- Vero

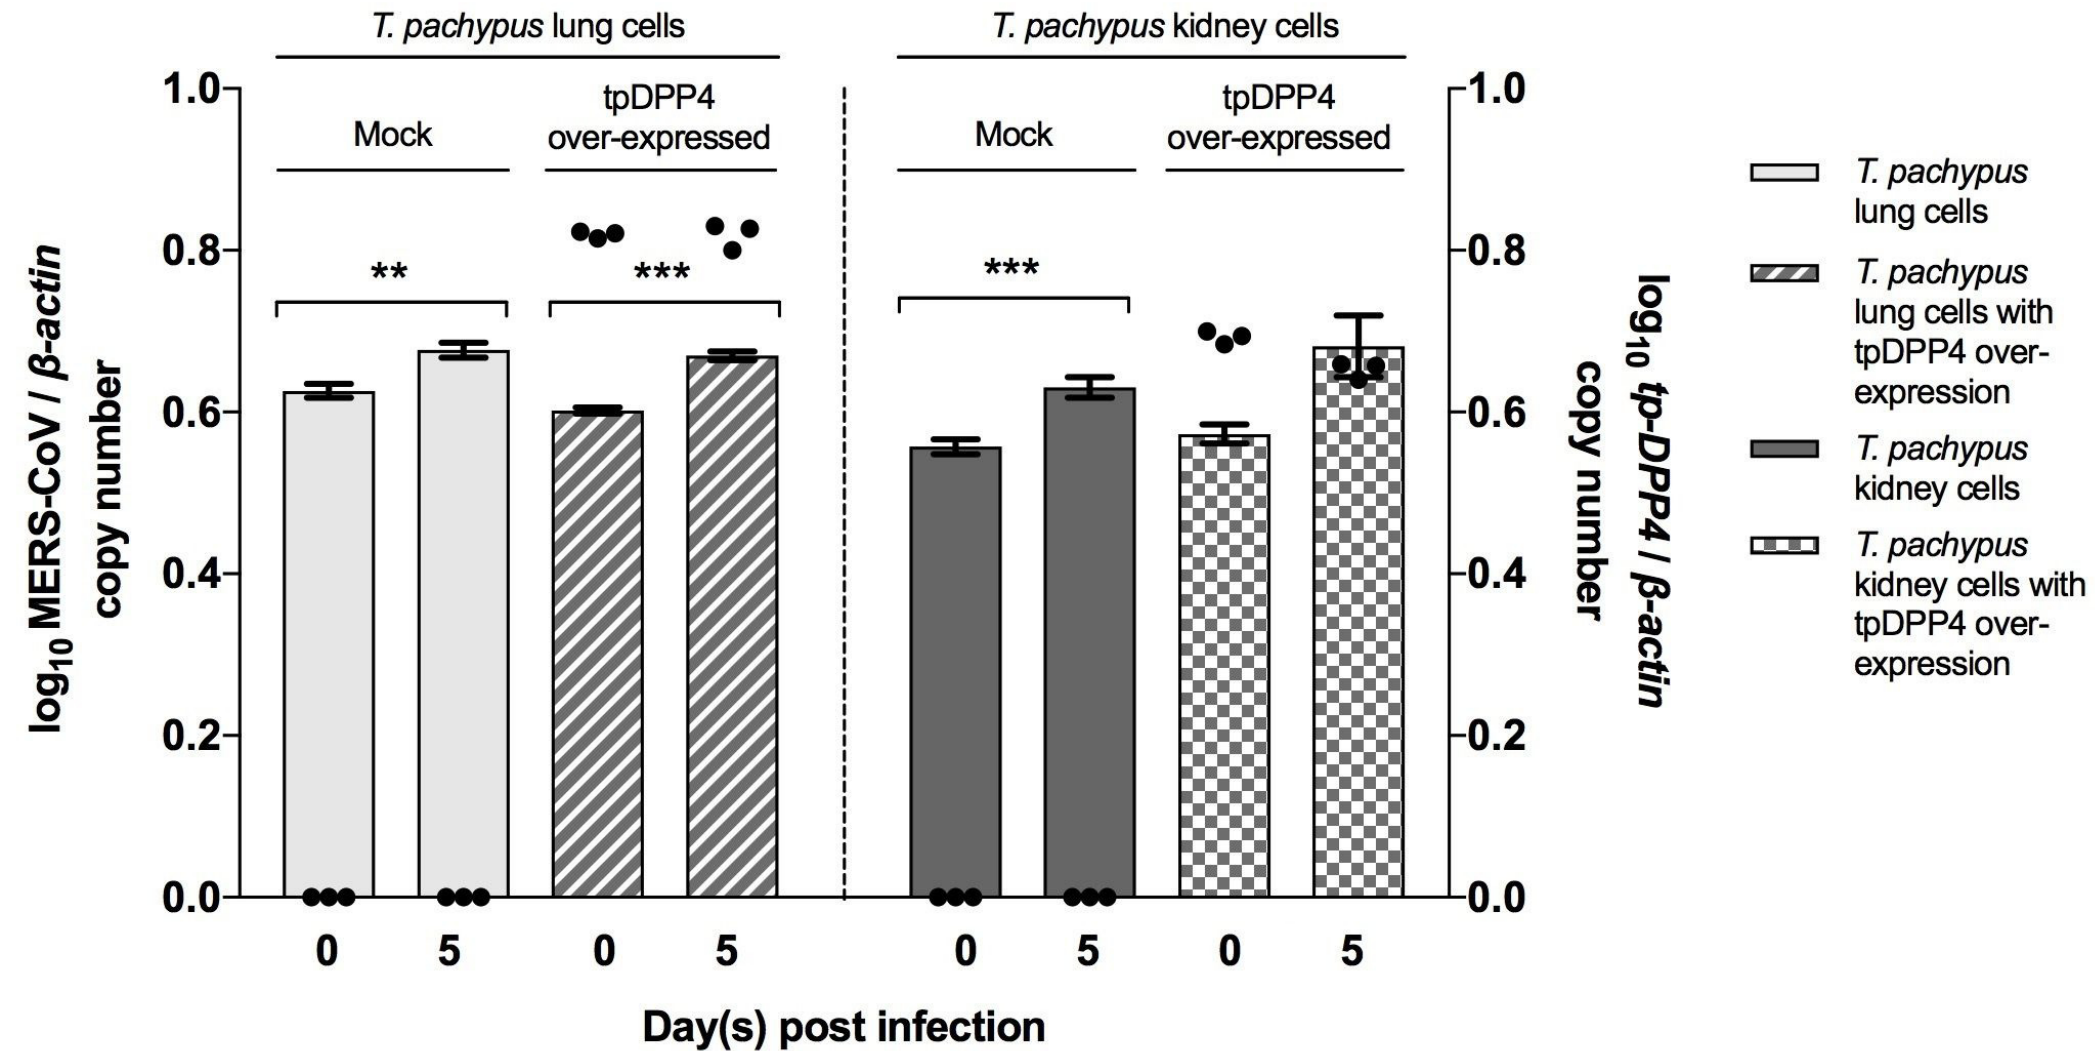

Source: http://biorxiv.org/content/10.1101/326538v1.full.pdf
